CORRECTION

# Correction: TAC102 Is a Novel Component of the Mitochondrial Genome Segregation Machinery in Trypanosomes

Roman Trikin, Nicholas Doiron, Anneliese Hoffmann, Beat Haenni, Martin Jakob, Achim Schnauffer, Bernd Schimanski, Benoît Zuber, Torsten Ochsenreiter

## Notice of Republication

This article was republished on June 16, 2016, to correct errors in the figure legends that were introduced during the typesetting process. Please download this article again to view the correct version. The originally published, uncorrected article and the republished, corrected article are provided here for reference.

## Supporting Information

**S1 File. Originally published, uncorrected article.**  
(PDF)

**S2 File. Republished, corrected article.**  
(PDF)

## Reference

1. Trikin R, Doiron N, Hoffmann A, Haenni B, Jakob M, Schnauffer A, et al. (2016) TAC102 Is a Novel Component of the Mitochondrial Genome Segregation Machinery in Trypanosomes. *PLoS Pathog* 12(5): e1005586. doi: [10.1371/journal.ppat.1005586](https://doi.org/10.1371/journal.ppat.1005586) PMID: [27168148](https://pubmed.ncbi.nlm.nih.gov/27168148/)

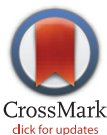

## OPEN ACCESS

**Citation:** Trikin R, Doiron N, Hoffmann A, Haenni B, Jakob M, Schnauffer A, et al. (2016) Correction: TAC102 Is a Novel Component of the Mitochondrial Genome Segregation Machinery in Trypanosomes. *PLoS Pathog* 12(7): e1005750. doi:10.1371/journal.ppat.1005750

**Published:** July 1, 2016

**Copyright:** © 2016 Trikin et al. This is an open access article distributed under the terms of the [Creative Commons Attribution License](https://creativecommons.org/licenses/by/4.0/), which permits unrestricted use, distribution, and reproduction in any medium, provided the original author and source are credited.
